# Supplementary material for: Nitrogen-doped highly dense but porous carbon microspheres with ultrahigh volumetric capacitance and rate capability for supercapacitors
Source: Royal Society of Chemistry journal article supplement (doi:10.1039/c8ta05984e), 2018-09-18
Supplement: c8ta05984e1.pdf [file c8ta05984e1.pdf]

## Supplementary Figures

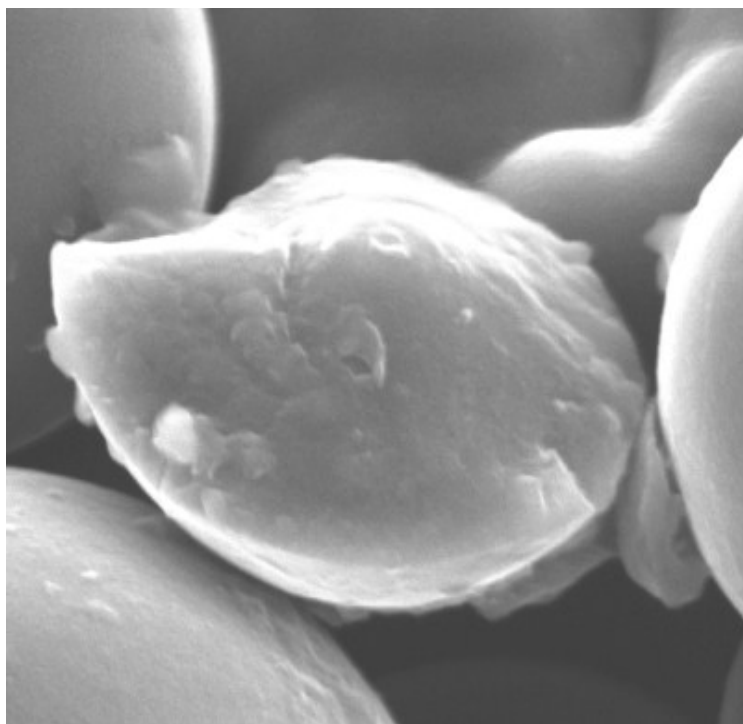

**Figure S1.** A high-magnification SEM image of a fractured nitrogen doped carbon precursors.

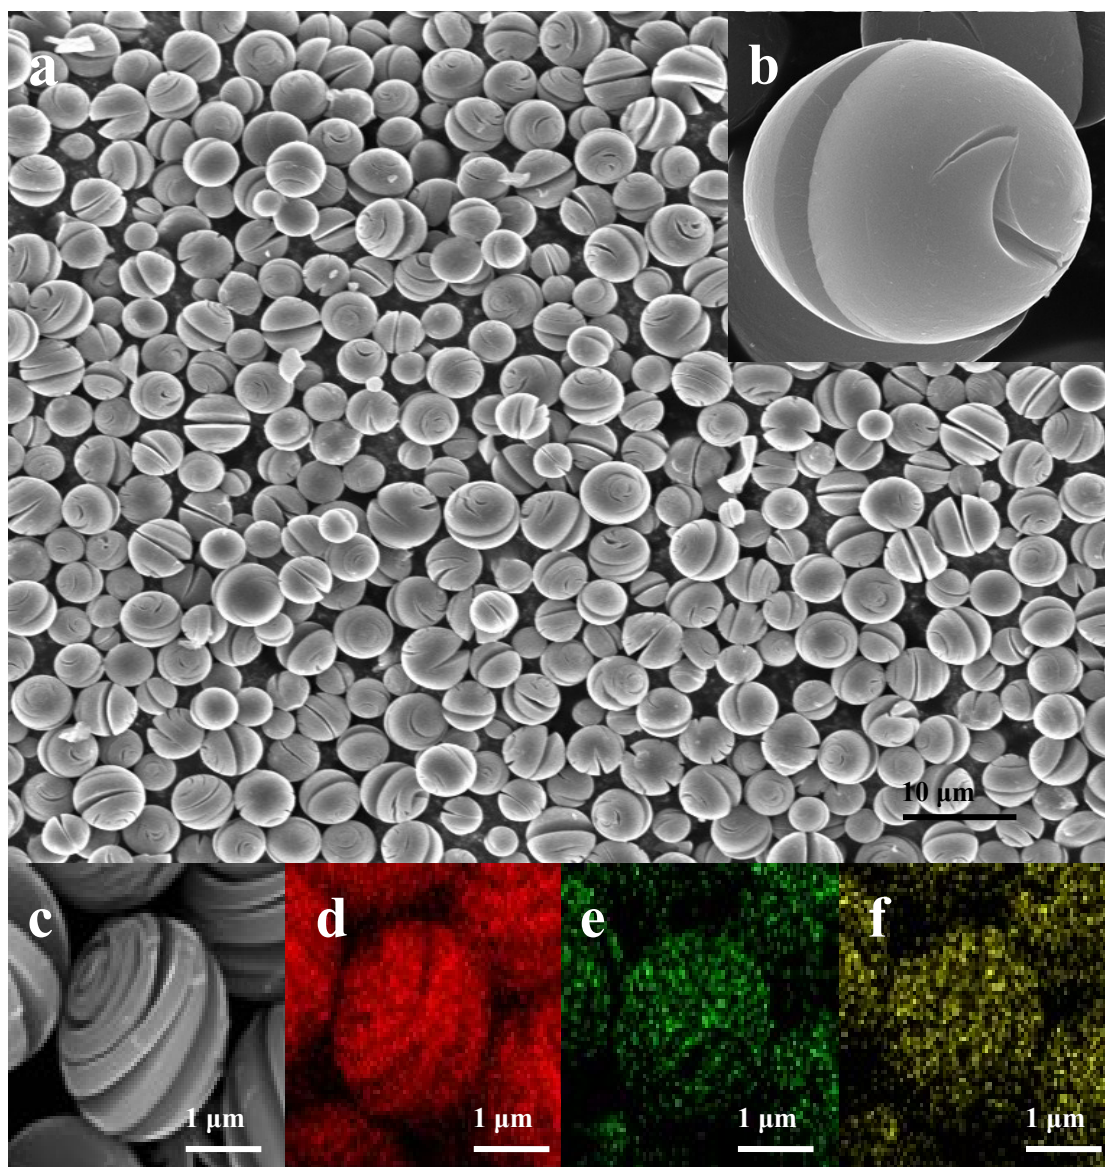

**Figure S2. Morphology and elemental distribution of the MAC-N<sub>0.5</sub> electrode:** (a) a low-magnification SEM image of the MAC-N<sub>0.5</sub>; (b) a high-magnification SEM image showing a spherical morphology of the MAC-N<sub>0.5</sub>; (c) a SEM image of the MAC-N<sub>0.5</sub> and the corresponding EDS elemental mappings of (d) carbon (red), (e) nitrogen (green), and (f) oxygen (yellow).

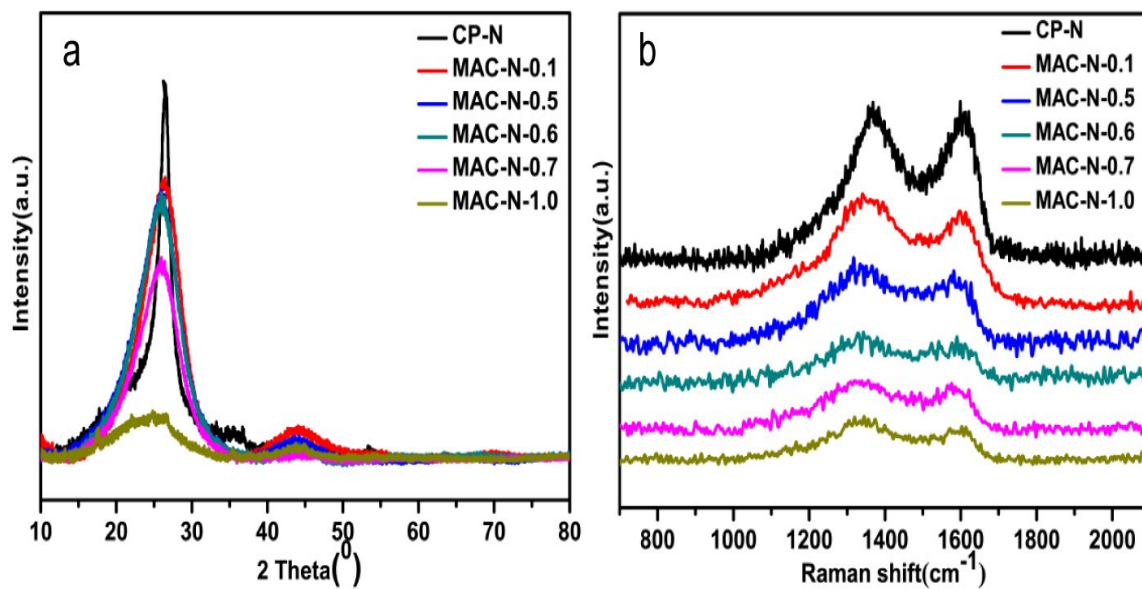

**Figure S3. Structural characterization of the CP-N and MAC-N<sub>x</sub> (x=0.1, 0.5, 0.6, 0.7, 1.0): (a) XRD patterns and (b) Raman spectra.**

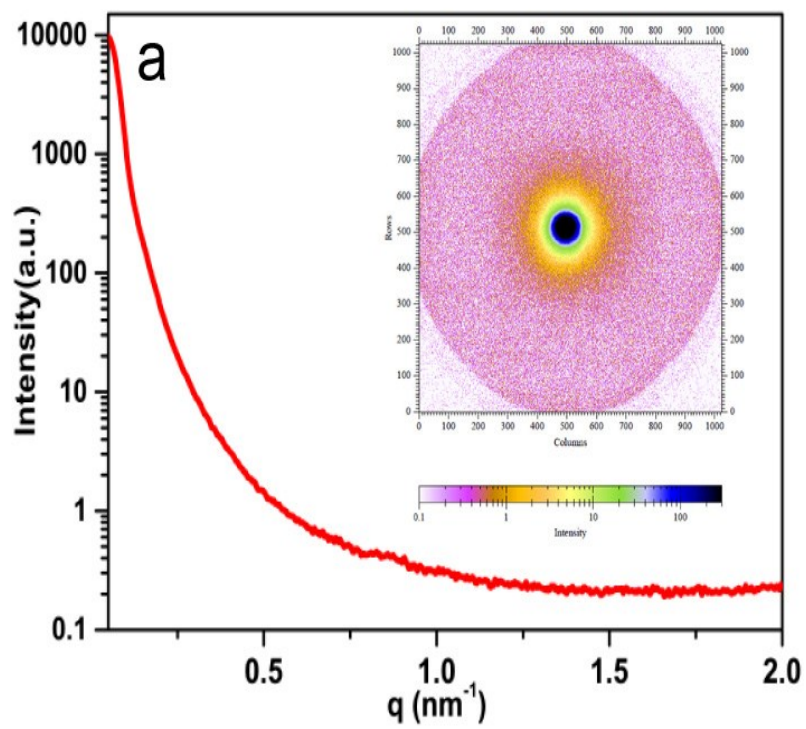

**Figure S4.** Small-angle x-ray scattering (SAXS) patterns of the nitrogen doped carbon precursors

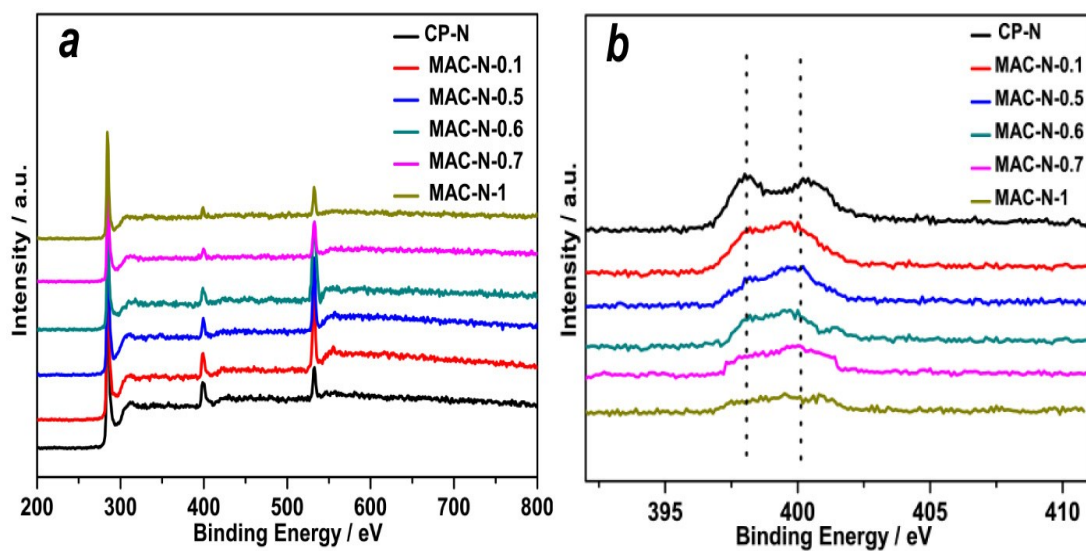

**Figure S5. Chemical analysis of the CP-N and MAC-N<sub>x</sub> (x=0.1,0.5,0.6,0.7,1.0): (a)** XPS survey spectra; and **(b)** High-resolution XPS spectra of N 1s, respectively.

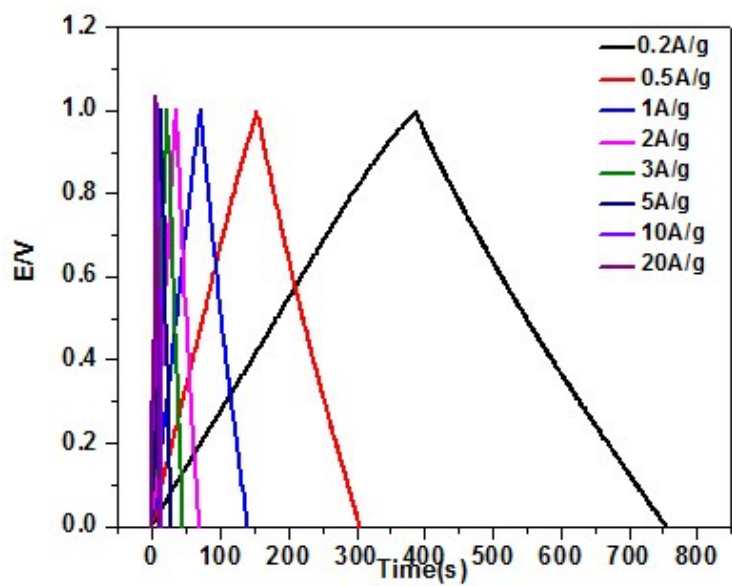

**Figure S6.** Galvanostatic charge/discharge curves of the MAC-N<sub>0.5</sub> sample in a 6 M KOH solution with different current densities using two electrodes;

## Supplementary Tables

**Table S1:** The carbon yield of the nitrogen doped carbon precursors and MAC-N-x

(x = 0.1, 0.5, 0.6, 0.7, 1.0)

| <b>Samlpe</b> | <b>Yield</b> |
|---------------|--------------|
| CP-N          | 28.1%        |
| MAC-N-0.1     | 25.8%        |
| MAC-N-0.5     | 24.7%        |
| MAC-N-0.6     | 23%          |
| MAC-N-0.7     | 21.9%        |
| MAC-N-1       | 19.1%        |

**Table S2:** N content of carbons obtained from XPS

| <b>Sample</b>              | <b>pyridinic N</b> | <b>pyrrolic N</b> | <b>graphitic N</b> |
|----------------------------|--------------------|-------------------|--------------------|
| <b>CP-N</b>                | <b>39%</b>         | <b>46%</b>        | <b>15%</b>         |
| <b>MAC-N<sub>0.1</sub></b> | <b>33%</b>         | <b>50%</b>        | <b>17%</b>         |
| <b>MAC-N<sub>0.5</sub></b> | <b>31%</b>         | <b>50%</b>        | <b>19%</b>         |
| <b>MAC-N<sub>0.6</sub></b> | <b>34%</b>         | <b>45%</b>        | <b>21%</b>         |
| <b>MAC-N<sub>0.7</sub></b> | <b>38%</b>         | <b>39%</b>        | <b>23%</b>         |
| <b>MAC-N<sub>1.0</sub></b> | <b>44.5%</b>       | <b>27%</b>        | <b>28.5%</b>       |



**Table S3:** Performance of selected porous carbon materials for ECs

| Item                                 | density<br>g cm <sup>-3</sup> | mass<br>density/<br>mg cm <sup>-2</sup> | BET/<br>m <sup>2</sup> g | electrolyt<br>e/mol                         | C <sub>g</sub> /Fg <sup>-1</sup><br>(I/A g <sup>-1</sup> ) | C <sub>vol</sub> /<br>F cm <sup>-3</sup> | rate<br>capability<br>(A g <sup>-1</sup> ) | C <sub>a</sub><br>F<br>cm <sup>-2</sup> | Ref          |
|--------------------------------------|-------------------------------|-----------------------------------------|--------------------------|---------------------------------------------|------------------------------------------------------------|------------------------------------------|--------------------------------------------|-----------------------------------------|--------------|
| Densely<br>PGC                       | 0.96                          | 3                                       | 1103                     | KOH (6<br>mol)                              | 374 (0.<br>5)                                              | 360                                      | 75 %<br>0.5 to 20                          | 1.12                                    | 1            |
| CMG                                  | 0.5                           | 2                                       | 705                      | KOH<br>5.5mol                               | 135<br>(1.33)                                              | 67.5                                     | 40 %<br>0.1 to 2.5                         | 0.96                                    | 2            |
| High porous<br>grapheme<br>macroform | 1.58                          | No<br>data                              | 367                      | KOH (6<br>mol)                              | 238<br>(0.1)                                               | 376                                      | 69 %<br>0.1 to 15                          | No<br>data                              | 3            |
| Commercial<br>activated<br>carbon    | 0.5~0.<br>7                   | 1-3                                     | 2000                     | KOH (6<br>mol)                              | 160~20<br>0                                                | 80~11<br>0                               | No data                                    | No<br>data                              | 4            |
| vertically<br>aligned<br>reduced GO  | 1.18                          | 3.5                                     | 123                      | KOH (6<br>mol)                              | 145<br>(0.5)                                               | 171                                      | 72 %<br>0.5 to 20                          | 1.83                                    | 5            |
| N/F doped<br>CM                      | 1.93                          | 2.1                                     | 1.4                      | KOH (6<br>mol)                              | 189<br>(0.1)                                               | 365                                      | 64 %<br>0.1 to 5                           | 2.43                                    | 6            |
| N-doped<br>SGC                       | 0.44                          | No<br>data                              | 2927                     | KOH (6<br>mol)                              | 481<br>(0.5)                                               | 212                                      | 65.1 %<br>0.5 to 20                        | No<br>data                              | 7            |
| 3D porous<br>carbon                  | 0.37                          | 3                                       | 2870                     | KOH (6<br>mol)                              | 318<br>(0.5)                                               | 118                                      | 59.4%<br>0.5 to 20                         | No<br>data                              | 8            |
| NS-rGO                               | 0.21                          | 3                                       | 1435                     | KOH (6<br>mol)                              | 237<br>(1)                                                 | 51.4                                     | 72.3 %<br>1 to 30                          | 0.71                                    | 9            |
| FGN-300                              | 1.03                          | 2.9                                     | 285                      | KOH (6<br>mol)                              | 456<br>(0.5)                                               | 470                                      | 44 %<br>0.5 to 20                          | 1.41                                    | 10           |
| OMFLC-N                              | 0.65                          | 0.5                                     | 1580                     | H <sub>2</sub> SO <sub>4</sub> (<br>0.5mol) | 855<br>(1)                                                 | 560                                      | 71.9 %<br>1 to 40                          | No<br>data                              | 11           |
| Holey<br>graphene                    | 0.71                          | 1                                       | 1560                     | KOH (6<br>mol)                              | 310<br>(1)                                                 | 221                                      | 65 %<br>1 to 100                           | 2.62                                    | 12           |
| MAC-N-0.5                            | 1.49                          | 1.7                                     | 327                      | KOH (6<br>mol)                              | 385<br>(0.2)                                               | 573                                      | 86.3 %<br>0.2 to 20                        | 3.42                                    | This<br>work |

## Supplementary reference

- [1] L. Chen, L. Jiang, L. Zhi and Z. Fan. *Nano Energy*, 2015, **12**, 141–1512.
- [2] J. Luo, H. D. Jang and J. Huang. *ACS Nano*, 2013, **7**, 1464-1471.
- [3] Y. Tao, X. Xie, W. Lv, D.-M. Tang, D. Kong, Z. Huang, H. Nishihara, T. Ishii, B. Li, D. Golberg, F. Kang, T. Kyotani and Q.-H. Yang. *Sci. Rep.*, 2013, **3**, 2975.
- [4] P. Simon and Y. Gogotsi. *ACC Che Res.*, 2013, **46**, 1094-1103.
- [5] Y. Yoon, K. Lee, S. Kwon, S. Seo, H. Yoo, S. Kim, Y. Shin, Y. Park, D. Kim, J.-Y. Choi and H. Lee, *ACS Nano*, 2014, **8**, 4580-4590.
- [6] J. Zhou, J. Lian, L. Hou, J. Zhang, H. Gou, M. Xia, Y. Zhao, T. A. Strobel, L. Tao and F. Gao, *Nat. Commun.*, 2015, **6**, 8503.
- [7] J. Yan, Q. Wang, C. Lin, T. Wei and Z. Fan, *Adv. Energy Mater.*, 2014, **4**, 1400500.
- [8] L. Qie, W. Chen, H. Xu, X.-Q. Xiong, Y. Jiang, F. Zou, X. Hu, Y. Xin, Z. Zhang and Y. Huang, *Energy Environ. Sci.*, 2013, **6**, 2497-2504.
- [9] Y. Yoon, K. Lee, C. Baik, H. Yoo, M. Min, Y. Park, S. M. Lee and H. Lee, *Adv. Mater.*, 2013, **25**, 4437-4444
- [10] J. Yan, Q. Wang, T. Wei, L. Jiang, M. Zhang, X. Jing and Z. Fan, *ACS Nano*, 2014, **8**, 720-4729.
- [11] T. Lin, I-W. Chen, F. Liu, C. Y, H. Bi, F. Xu and F. Huang, *Science*, 2015, **350**, 1508-1513.
- [12] Y. X. Xu, Z. Y. Lin, X. Zhong, X. Q. Huang, N. O. Weiss, Y. Huang and X. F. Duan, *Nat. Commun.*, 2014, **5**, 4554.
